# Supplementary material for: HuMiTar: A sequence-based method for prediction of human microRNA targets
Source: PubMed Central journal article supplement (PMC2631598; doi:10.1186/1748-7188-3-16), 2008-12-22
Supplement: 1748-7188-3-16-S1.pdf [file 1748-7188-3-16-S1.pdf]

# **Supplement for article entitled “HuMiTar: A sequence-based method for prediction of human microRNA targets”**

Jishou Ruan<sup>1</sup>, Hanzhe Chen<sup>1</sup>, Lukasz Kurgan<sup>2\*</sup>, Ke Chen<sup>2</sup>, Chunsheng Kang<sup>3</sup> and Peiyu Pu<sup>3</sup>

<sup>1</sup>Chern Institute for Mathematics, College of Mathematics and LPMC, Nankai University, Tianjin, PRC

<sup>2</sup>Department of Electrical and Computer Engineering, University of Alberta, Canada

<sup>3</sup>Neuro-oncology laboratory, General Hospital of the Tianjin Medical University, Tianjin, PRC

\* Author to whom correspondence should be addressed.

Department of Electrical and Computer Engineering, University of Alberta, Canada, T6G 2V4, phone (780) 4925488, fax (780) 4921811, email: lkurgan@ece.ualberta.ca

## Detailed description of HuMiTar

HuMiTar works in two steps: (1) a 2D-coding method finds candidate targets by scanning 3'UTR of a given mRNA; and (2) the selected candidate targets are filtered using a composite scoring function.

### Motivation

A number of recent contributions discuss characteristic features of the miR-mRNAs duplexes [1-14]. They usually subdivide miR sequence into four regions. Although this division seems to be consistent between different works, their conclusions with respect to the formation of complementary base-pairing in these regions vary. One explanation for these differences is that the conclusions were based on different and limited size data. We summarize potential configurations of miR-mRNA duplexes as follows:

- In position 1, the pair may or not be complementary.
- In seed region (positions 2 to 8), the base pairing is usually assumed to be perfectly complementary [1-13]. The G:U (G:T) pairing is not permitted in seed region but it is allowed in the remaining positions.
- In region 1 (positions 9 to 13), the complementarity of the base pairs was investigated and assumed important in only a few contributions [1, 2, 6, 13], suggesting that their formation could have limited impact on the formation of the duplexes.
- In region 2 (positions 14 to 20), partially complementary base pairing is formed [1, 2, 4-8]; the complementarity is found to be important, but it is not required for all positions, as in the case of the seed region.

These results, which indicate the importance of base pairing of regions outside of the seed, motivate development of the proposed method. Since the conclusions concerning complementarity for regions 1 and 2 were based on samples of limited size (the abovementioned contributions studied only a few duplexes), we computed statistical information that aims at confirming/refuting these observations using the design set of 66 experimentally derived human miR-mRNAs duplexes shown in Table 1.

We use this information to parameterize the proposed prediction method, i.e., to establish weights that quantify the degree to which each of the positions in the miR sequence is required to form complementary pairs. The weights are used to develop reward and penalty functions, which together are used to implement scoring function that is applied to filter potential miR-mRNA duplexes. Although the length of the miRs can range between 18 and 28 nts, we decided to fix it at 21 nts, since majority of the miR have at least 21 nts. This allows assuring that enough statistical information is used to estimate the weights for these positions, i.e., number of duplexes with miRs longer than 21 would be too small to get a good estimate for weight values.

We note that inclusion of the stacked pairs and information concerning unpaired regions could lead to improved prediction rates. Due to limited sample size (number of duplexes used to parameterize the scoring function), inclusion of these factors could lead to the prediction model that would not generalize well outside of the training duplexes. We plan to include these factors, as the future work, when the amount of available training/test duplexes will increase.

## Statistical analysis of base pairing in the miR-mRNA complex

First, we concentrate on the analysis of the distribution of potential base pairs in the seed region. The conditional frequencies of the potential nucleotide pairs formed between miR's seed region and the corresponding mRNA site,  $p(T_i:T_j | \text{mRNA site})$ , where  $T_i$  and  $T_j \in \{A, C, G, T(U)\}$  and given that the binding concerns the actual site, are shown in Table 10. As expected, the complimentary C: G and A: T (U) pairs dominate the binding; the other pairs combined amount to only about 5% of cases. Although the remaining 5% of pairs agree with recent the results that suggest that imperfect pairing in the seed region could occur [14], the results clearly indicate that Watson-Crick base pairing is dominant in this region. The unconditional frequencies,  $q(T_i:T_j)$ , which are defined as the frequency of the base pairs  $T_i:T_j$  computed by sliding the miR's seed region over all 7 nts drawn from the 66 mRNAs are shown in Table 10. The affinity of each nucleotide pair to form a bond between miR and mRNA is defined as  $k(T_i:T_j) = \log_2(p(T_i:T_j | \text{mRNA site})/q(T_i:T_j))$ , see Table 11. Although  $p(A:G)$  and  $p(T(U):C)$  equal 0, since our data is limited to 66 sites we anticipate that these pairs could occur in the miR-mRNA duplex with a low probability, i.e.,  $p(A:G) = 2^{-10} q(A:G)$ , and thus the corresponding affinities of A:G and C:T(U) pairs are assumed to equal -10. The same computations were performed for miR sequence located in regions 1 and 2 combined, see Table 11.

The affinity values in the seed and non-seed regions allow to quantify the relative differences in binding of individual nucleotide pairs (include the Watson-Crick and other pairings). The differences in affinity values of the same pairs for different regions show that the existence of the corresponding pairs in a considered candidate complex should be weighed accordingly. We apply the principles of balance of moments, in which each pair at position  $k$  is characterized by the mass  $k(T_i:T_j)$  (which corresponds to the affinity to form bonds in the miR-mRNA complexes) and arm length  $x_k$ , and where the moment value is computed as  $k(T_i:T_j) \times x_k$ . The underlying interpretation is that the high affinity to bind in the seed region between a given miR and mRNA fragment should be balanced by sufficiently large affinity to bind in the non-seed regions (regions 1 and 2). At the same time, the affinity is positively affected by the formation of complementary base pairs (which is quantified by the *reward function*), and negatively affected by formation of non-complementary base pairs (which is quantified by the *penalty function*). The strength of the impact of individual nucleotide pairs is estimated using the affinity coefficients  $k(T_i:T_j)$  shown in Table 11. We assume that the sum of moments generated by positions in the seed region should be greater than the sum of moment of the positions in regions 1 and 2. This problem is formulated and solved, i.e., the corresponding scoring function that optimizes the balance between binding in the seed and the non-seed regions is parameterized, using a standard linear programming model.

### Reward function

The reward function computes a score based on weighted sum of binding affinity coefficients for the complementary C:G and A:T(U) pairs (where different weights are used for different regions, see Table 11) along all positions in the seed region and the regions 1 and 2. Our approach balances the impact of complementary pairs in the seed region and with the complementary pairs in the non-seed region.

Assuming that the arm length value for the complementary pairs in the seed regions are assumed to equal 10 (all positions in the seed region are assumed equally important as

they all usually include complementary base pairs), the two moments are defined as

$$S(G:C) = \sum_{k=2}^8 10 \times 1_{\{G:C, C:G\}}(X_k : Y_k) \log_2 \frac{p(G:C)}{q(G:C)}$$

$$S(A:U) = \sum_{k=2}^8 10 \times 1_{\{A:U, U:A\}}(X_k : Y_k) \log_2 \frac{p(A:U)}{q(A:U)}$$

where  $p$  and  $q$  denote the conditional and unconditional frequencies of nucleotide pairs, respectively, and  $S(G:C)$  and  $S(A:U)$  applies to seed positions where the G:C and A:T(U) pairs are identified, correspondingly. The sum of  $S(G:C)$  and  $S(A:U)$  moments is considered as the *total moment of the seed region*. The minimal total moment value when complementary binding is assumed for the seed region equals  $10 \times 6 \times k(A:U)$ , in which case positions 2 to 7 include A:U base pairs and positions 1 and 8 include non-complementary pairs.

The *total moment of the non-seed region* is defined as

$$S(3') = \sum_{k=1}^{12} x_k 1_{\{(A:U), (U:A), (G:C), (C:G), (G:U), (U:G)\}}(X_{8+k} : Y_{8+k}) \log_2 \frac{p(X_{8+k} : Y_{8+k})}{q(X_{8+k} : Y_{8+k})}$$

where  $x_k$  is the arm length of  $k^{\text{th}}$  position,  $k=9,10, \dots,20$ , which values are estimated below, and where G:T (U) pairing is permitted. Assuming that the total moment (sum of the moments) for positions within the non-seed region should be smaller than the minimal total moment for the seed region, the arm length values used to implement the moment of the non-seed region should satisfy the following

$$\begin{cases} \max \left\{ \sum_{k=1}^{12} x_k 1_{\{(A:U), (U:A), (G:C), (C:G), (G:U), (U:G)\}}(X_{8+k} : Y_{8+k}) \log_2 \frac{p(X_{8+k} : Y_{8+k})}{q(X_{8+k} : Y_{8+k})} \right\} \leq 6 \times 10 \times k(A:U) \\ x_1, x_2, \dots, x_{12} \geq 0 \end{cases} \quad \text{I}$$

in other words,

$$\begin{cases} Y(x_1, \dots, x_{12})^\tau \leq (\overbrace{b, \dots, b}^N)^\tau \\ x_1, x_2, \dots, x_{12} \geq 0 \end{cases}$$

in which

$$Y = \begin{pmatrix} 1_A(X_9^1 : Y_9^1) \log_2 \frac{p(X_9^1 : Y_9^1)}{q(X_9^1 : Y_9^1)} & \dots & \dots & 1_A(X_{20}^1 : Y_{20}^1) \log_2 \frac{p(X_{20}^1 : Y_{20}^1)}{q(X_{20}^1 : Y_{20}^1)} \\ 1_A(X_9^2 : Y_9^2) \log_2 \frac{p(X_9^2 : Y_9^2)}{q(X_9^2 : Y_9^2)} & \dots & \dots & 1_A(X_{20}^2 : Y_{20}^2) \log_2 \frac{p(X_{20}^2 : Y_{20}^2)}{q(X_{20}^2 : Y_{20}^2)} \\ \dots & \dots & \dots & \dots \\ 1_A(X_9^N : Y_9^N) \log_2 \frac{p(X_9^N : Y_9^N)}{q(X_9^N : Y_9^N)} & \dots & \dots & 1_A(X_{20}^N : Y_{20}^N) \log_2 \frac{p(X_{20}^N : Y_{20}^N)}{q(X_{20}^N : Y_{20}^N)} \end{pmatrix}$$

$$= (Y_1, Y_2, \dots, Y_{12})$$

and

$$b = 10 \times 6 \times k(A:U), \quad \mathbf{A} = \{(A:U), (U:A), (G:C), (C:G), (G:U), (U:G)\} \quad \text{and } N = 12.$$

The above boils down to solving the below linear programming problem

$$\min \{E(x_1 Y_1 + x_2 Y_2 + \dots + x_{12} Y_{12})\}$$

with the following solution

$$(x_1, x_2, \dots, x_{12}) = (3.89578, 4.53040, 12.50749, 2.33966, 12.87955, 23.26832, \\ 1.69679, 2.97427, 9.75416, 13.72082, 0, 3.67476)$$

The solution shows that the formation of complementary pairs for positions 9, 10, 12, 15, 16, 19 and 20 is less “important” (has smaller arm length values) than for the positions 11, 13, 14, 17 and 18. We note that a recent study that investigated Watson-Crick pairing for contiguous nucleotides concluded that positions 13-16 have the strongest preference for the complementary pairing [15]. Although we consider each position individually, while the other study analyzed multimers, we observe certain similarities. In both cases, positions 13 and 14 are considered to have stronger tendency to form complementary pairs.

Finally, the *reward function* is defined as

$$R = S(G: C) + S(A: U) + S(3')$$

An empirical test with the design dataset shows that the reward function, which is based solely on formation of complementary pairs along the entire miR sequence, is not sufficient to distinguish between true and false targets. Figure 1A shows a distribution of the reward score values for targets that exclude the actual binding sites, while Figure 1B shows the distribution for the actual targets. The reward scores of the 66 miR-mRNA targets range between 133.9 and 245, while the scores of a set of non miR-mRNA targets range between 9.6 and 208.9. Although the overlap between the reward scores for the actual and the false sites is relatively small when compared with the overall range of values, see Figure 1, it does not allow perfect separation of the targets. As a result, we introduce the penalty function that quantifies a penalty for all non-complementary pairs formed with a given target.

### Penalty function

The cost function is defined as:

$$C_i = 10 \sum_{k=2}^8 1_M(T_k : m_{i+21-k}) \log_2 \frac{p(T_k : m_{i+21-k})}{q(T_k : m_{i+21-k})} + \sum_{k=9}^{21} x_k 1_M(T_k : m_{i+21-k}) \log_2 \frac{p(T_k : m_{i+21-k})}{q(T_k : m_{i+21-k})}$$

where  $T_1 T_2 \dots T_{21}$  denotes a miR sequence,  $m_N m_{N-1} \dots m_2 m_1$  denotes an inversely ordered segment of an mRNA sequence,  $1_M(T_k : m_{i+21-k})$  indicates a given nucleotide pair in which  $M$  is a set of non-complementary pairs (A:A, G:G, etc.), and the values of  $p$  and  $q$  are shown in Table 10.

### Scoring function

The scoring function is defined as a difference between the reward and the cost functions:

$$SF_i = R - C_i$$

where  $i$  denotes the target’s position in the mRNA sequence.

Figure 2A shows a distribution of the scoring function values for targets that exclude the actual binding sites, while Figure 2B shows the distribution for the actual targets. We observe that the separation between the set of scores for actual miR-mRNA duplexes and false targets is improved when compared with using the reward function alone; compare Figures 1 and 2. Most specifically, the false targets generate scores between -512.9 and

150.6, while the scores for the true targets range between 12.8 and 243.4. Using a threshold value equal to 70, there are only 7 false miR-mRNA duplexes (duplexes that involve some miRs from the design set that target positions which are not published in TarBase) in the interval (70,150.6), and only 4 true miR-mRNA sites in the interval (12.8, 70). Therefore, using this threshold on the design dataset, i.e., we assume that a given predicted miR-mRNA duplex is true if the corresponding  $SF_i \geq 70$ , results in generating 7 false positives and 4 false negatives.

## 2D-coding method

The actual miR-mRNA duplexes may involve more than 21nts due to the formation of bulges. Within the design dataset that includes 66 actual miR-mRNA duplexes, the maximal length of the corresponding mRNA sequence is 46nts, while the maximal miR's length is 25nts. For example, the miR-mRNA duplex shown in Figure 3 includes 25nts for miR and 23nts for mRNA. This duplex can be rewritten in a linear form as follows

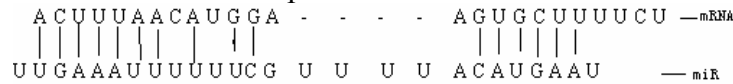

After removing the non-matching bulge segment

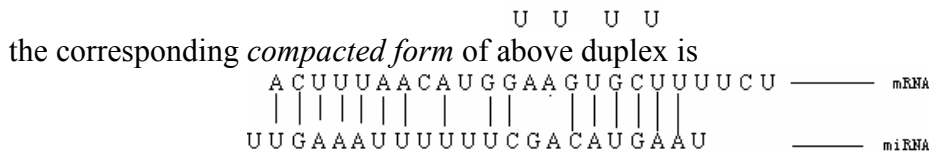

We use the compacted form to compute the scoring function value.

Following this example, we introduce a 2D-coding method that aims at generation of the compacted duplex form. Assuming that  $T_1T_2\dots T_{21}$  denotes a miR and  $m_Nm_{N-1}\dots m_2m_1$  denotes the inversely ordered segment of an mRNA sequence we consider the following duplex

$$\begin{matrix} m_N, m_{N-1}, \dots, m_2, m_1 \\ T_1T_2\dots T_{21} \end{matrix}$$

The basic principle of the 2D-coding is to scan an mRNA segment by finding stretches (segments) of complementary base pairs, which are denoted by  $A_i$  where  $i = 1, 2, \dots, 5$ . We start with finding the first segment, denoted by  $A_1$ , in the miR's seed region, and then continue along the miR's sequence, see Figure 4.

The procedure will stop after finding  $A_5$  since no more than five complementary segments can be found for the considered duplexes in the design set. The 2D-coding converts the original  $m_N m_{N-1}\dots m_2 m_1$  and  $T_1T_2\dots T_k$  ( $k \leq 25$ ) sequences into their corresponding compacted forms. The compacted form uses  $\{a, c, g, u, A_1, A_2, A_3, A_4, A_5\}$  alphabet where  $a, c, g,$  and  $u$  denote non-complementary pairs and  $A_i$  denotes the complementary segments. The 2D-coding algorithm applies two thresholds, which are equal 15 (in steps II and VI) and 47 (in steps V and VII). The former threshold specifies the distance between  $A_1$  and  $A_2$ , which is also used in [7]. The threshold value was computed as a sum of the average distance between  $A_1$  and  $A_2$  (7.83) and the standard deviation of the average (7.75) over the human miR-mRNA duplexes. The second threshold was computed as  $26+3*7 = 47$  where 26 and 7 are the average length and standard deviation of mRNA segments in the human miR-mRNA duplexes, respectively.

Using the proposed 2D-coding method, the miR and corresponding mRNA sequences in the compacted form may have different length. They can be aligned based on the scoring matrix shown in Table 12. Table 13 shows several example compacted forms that were obtained using the 2D-coding method.

### HuMiTar algorithm

The pseudo-code of HuMiTar method is shown in Figure 5 in the main text.

## References

1. Enright AJ, John B, Gaul U, Tuschl T, Sander C, Marks DS: **MicroRNA targets in Drosophila**. *Genome Biol.* 2003, **5**(1):R1.
2. Lewis BP, Shih I, Jones-Rhoades MW, Bartel DP, Burge CB: **Prediction of mammalian microRNA targets**. *Cell* 2003, **115**:787–798.
3. Stark A, Brennecke J, Russell RB, Cohen SM: **Identification of Drosophila MicroRNA targets**. *PLoS Biol.* 2003, **1**(3):e397.
4. Doench JG, Sharp PA: **Specificity of microRNA target selection in translational repression**. *Genes Dev.* 2004, **18**(5):504-511.
5. John B, Enright AJ, Aravin A, Tuschl T, Sander C, Marks DS: **Human microRNA targets**. *PLoS Biol.* 2004, **2**(11):e363.
6. Kiriakidou M, Nelson P, Kouranov A, Fitziev P, Bouyioukos C, Mourelatos Z, Hatzigeorgiou AG: **A combined computational- experimental approach predicts human miR targets**. *Genes & Dev.* 2004, **18**:1165–1178.
7. Rehmsmeier M, Steffen P, Hochsmann M, Giegerich R: **Fast and effective prediction of microRNA/target duplexes**. *RNA* 2004, **10**:1507–1517.
8. Vella MC, Reinert K, Slack FJ: **Architecture of a validated microRNA: target interaction**. *Chem. Biol.* 2004, **11**:1619–1623.
9. Krek A, Grun D, Poy MN, Wolf R, Rosenberg L, Epstein EJ, MacMenamin P, Piedade I, Gunsalus KC, Stoffel M, et al.: **Combinatorial microRNA target predictions**. *Nat. Genet.* 2005, **37**:495–500.
10. Lewis BP, Burge CB, Bartel DP: **Conserved seed pairing, often flanked by adenosines, indicates that thousands of human genes are microRNA targets**. *Cell* 2005, **120**:15–20.
11. Saetrom O, Snove O Jr, Saetrom P. **Weighted sequence motifs as an improved seeding step in microRNA target prediction algorithms**. *RNA* 2005, **11**(7): 995-1003.
12. Xie X, Lu J, Kulbokas EJ, Golub TR, Mootha V, Lindblad-Toh K, Lander ES, Kellis M: **Systematic discovery of regulatory motifs in human promoters and 3'UTRs by comparison of several mammals**. *Nature* 2005, **434**: 338–345.
13. Watanabe Y, Yachie N, Numata K, Saito R, Kanai A, Tomita M: **Computational analysis of microRNA targets in Caenorhabditis elegans**. *Gene* 2006, **365**:2-10.
14. Didiano D, Hobert O: **Perfect seed pairing is not a generally reliable predictor for miRNA-target interactions**. *Nat Struct Mol Biol.* 2006, **13**(9):849-51.
15. Grimson A, Kai-How Farth K, Johnston WK, Garnet-Engele P, Lim LP, Bartel DP: **MicroRNA targeting specificity in mammals: determinants beyond seed pairing**. *Molecular Cell* 2007, **27**:91-105.

## Supplementary tables

**TABLE 1. The design dataset of 66 human miR-mRNA duplexes.**

| miR      | Gene           | # targets | miR       | Gene            | # targets |
|----------|----------------|-----------|-----------|-----------------|-----------|
| let-7a   | KRAS2          | 5         | miR-16    | BCL2            | 1         |
| let-7a   | NRAS           | 4         | miR-17-5p | E2F1            | 2         |
| let-7b   | Lin28          | 1         | miR-199b  | LAMC2           | 1         |
| let-7e   | SMC1L1         | 1         | miR-19a   | PTEN            | 1         |
| miR-1    | Hand2          | 1         | miR-1b    | G6PD            | 3         |
| miR-1    | TMSB4X         | 1         | miR-1b    | BDNF            | 3         |
| miR-1    | HDAC4          | 2         | miR-20a   | E2F1            | 2         |
| miR-101  | EZH2           | 2         | miR-221   | KIT             | 1         |
| miR-101  | MYCN           | 2         | miR-222   | KIT             | 1         |
| miR-103  | FBXW1B         | 1         | miR-223   | NFIA            | 1         |
| miR-10a  | HOXA1          | 1         | miR-23    | HES1'(Y07572)   | 1         |
| miR-130  | CSF1           | 1         | miR-23    | HES1(NM_005524) | 3         |
| miR-132  | RICS (p250GAP) | 1         | miR-23    | POU4F2          | 3         |
| miR-133a | SRF            | 2         | miR-23a   | C6orf134        | 1         |
| miR-141  | Clock          | 1         | miR-23a   | CXCL12          | 2         |
| miR-143  | MAPK7          | 1         | miR-24    | MAPK14          | 1         |
| miR-145  | FLJ21308       | 1         | miR-26    | SMAD1           | 2         |
| miR-15a  | DMTF1          | 1         | miR-34    | DLL1            | 3         |
| miR-15a  | BCL2           | 1         | miR-34    | Notch1          | 2         |
| miR-16   | CGI-38         | 1         | miR-375   | Mtpn            | 1         |

**TABLE 2. Oncogenes predicted by HuMiTar, PicTar, TargetScanS, and NBmiRTar.**

| Gene name | Gene ID   | Description in homo sapiens                           |
|-----------|-----------|-------------------------------------------------------|
| Cx43      | NM_000165 | gap junction protein, alpha 1, 43kDa (connexin 43)    |
| KRAS2     | NM_033360 | v-Ki-ras2 Kirsten rat sarcoma viral oncogene homolog  |
| EGFR      | NM_005228 | epidermal growth factor receptor oncogene homolog     |
| CCND1     | NM_053056 | cyclin D1                                             |
| WNT5A     | NM_003392 | wingless-type MMTV integration site family, member 5A |
| MYC       | NM_002467 | v-myc myelocytomatosis viral oncogene homolog         |
| NOTCH1    | NM_017617 | notch homolog 1, translocation-associated             |
| CTNNB1    | NM_001904 | catenin (cadherin-associated protein), beta 1, 88kDa  |
| SEPT7     | NM_001788 | septin7 (SEPT7), transcript variant 1, mRNA           |
| PTEN      | NM_000314 | phosphatase and tensin homolog                        |



**TABLE 3. List of 328 human miRs that are associated with the selected ten oncogenes**

|                |               |                |                 |
|----------------|---------------|----------------|-----------------|
| hsa-let-7a     | hsa-miR-191   | hsa-miR-325    | hsa-miR-494     |
| hsa-let-7b     | hsa-miR-191*  | hsa-miR-326    | hsa-miR-495     |
| hsa-let-7c     | hsa-miR-192   | hsa-miR-328    | hsa-miR-496     |
| hsa-let-7d     | hsa-miR-193a  | hsa-miR-329    | hsa-miR-497     |
| hsa-let-7e     | hsa-miR-193b  | hsa-miR-33     | hsa-miR-498     |
| hsa-let-7f     | hsa-miR-194   | hsa-miR-330    | hsa-miR-499     |
| hsa-let-7g     | hsa-miR-195   | hsa-miR-331    | hsa-miR-500     |
| hsa-let-7i     | hsa-miR-196a  | hsa-miR-335    | hsa-miR-501     |
| hsa-miR-1      | hsa-miR-196b  | hsa-miR-337    | hsa-miR-502     |
| hsa-miR-100    | hsa-miR-197   | hsa-miR-338    | hsa-miR-503     |
| hsa-miR-101    | hsa-miR-198   | hsa-miR-339    | hsa-miR-504     |
| hsa-miR-103    | hsa-miR-199a  | hsa-miR-340    | hsa-miR-505     |
| hsa-miR-105    | hsa-miR-199a* | hsa-miR-342    | hsa-miR-506     |
| hsa-miR-106a   | hsa-miR-199b  | hsa-miR-345    | hsa-miR-507     |
| hsa-miR-106b   | hsa-miR-19a   | hsa-miR-346    | hsa-miR-508     |
| hsa-miR-107    | hsa-miR-19b   | hsa-miR-34a    | hsa-miR-509     |
| hsa-miR-10a    | hsa-miR-200a  | hsa-miR-34b    | hsa-miR-510     |
| hsa-miR-10b    | hsa-miR-200a* | hsa-miR-34c    | hsa-miR-511     |
| hsa-miR-122a   | hsa-miR-200b  | hsa-miR-361    | hsa-miR-512-3p  |
| hsa-miR-124a   | hsa-miR-200c  | hsa-miR-362    | hsa-miR-512-5p  |
| hsa-miR-125a   | hsa-miR-202   | hsa-miR-363    | hsa-miR-513     |
| hsa-miR-125b   | hsa-miR-202*  | hsa-miR-363*   | hsa-miR-514     |
| hsa-miR-126    | hsa-miR-203   | hsa-miR-365    | hsa-miR-515-3p  |
| hsa-miR-126*   | hsa-miR-204   | hsa-miR-367    | hsa-miR-515-5p  |
| hsa-miR-127    | hsa-miR-205   | hsa-miR-368    | hsa-miR-516-3p  |
| hsa-miR-128a   | hsa-miR-206   | hsa-miR-369-3p | hsa-miR-516-5p  |
| hsa-miR-128b   | hsa-miR-208   | hsa-miR-369-5p | hsa-miR-517*    |
| hsa-miR-129    | hsa-miR-20a   | hsa-miR-370    | hsa-miR-517a    |
| hsa-miR-130a   | hsa-miR-20b   | hsa-miR-371    | hsa-miR-517b    |
| hsa-miR-130b   | hsa-miR-21    | hsa-miR-372    | hsa-miR-517c    |
| hsa-miR-132    | hsa-miR-210   | hsa-miR-373    | hsa-miR-518a    |
| hsa-miR-133a   | hsa-miR-211   | hsa-miR-373*   | hsa-miR-518a-2* |
| hsa-miR-133b   | hsa-miR-212   | hsa-miR-374    | hsa-miR-518b    |
| hsa-miR-134    | hsa-miR-213   | hsa-miR-375    | hsa-miR-518c    |
| hsa-miR-135a   | hsa-miR-214   | hsa-miR-376a   | hsa-miR-518c*   |
| hsa-miR-135b   | hsa-miR-215   | hsa-miR-376a*  | hsa-miR-518d    |
| hsa-miR-136    | hsa-miR-216   | hsa-miR-376b   | hsa-miR-518e    |
| hsa-miR-137    | hsa-miR-217   | hsa-miR-377    | hsa-miR-518f    |
| hsa-miR-138    | hsa-miR-218   | hsa-miR-378    | hsa-miR-518f*   |
| hsa-miR-139    | hsa-miR-219   | hsa-miR-379    | hsa-miR-519a    |
| hsa-miR-140    | hsa-miR-22    | hsa-miR-380-3p | hsa-miR-519b    |
| hsa-miR-141    | hsa-miR-220   | hsa-miR-380-5p | hsa-miR-519c    |
| hsa-miR-142-3p | hsa-miR-221   | hsa-miR-381    | hsa-miR-519d    |
| hsa-miR-142-5p | hsa-miR-222   | hsa-miR-382    | hsa-miR-519e    |
| hsa-miR-143    | hsa-miR-223   | hsa-miR-383    | hsa-miR-519e*   |
| hsa-miR-144    | hsa-miR-224   | hsa-miR-384    | hsa-miR-520a    |
| hsa-miR-145    | hsa-miR-23a   | hsa-miR-409-3p | hsa-miR-520a*   |
| hsa-miR-146a   | hsa-miR-23b   | hsa-miR-409-5p | hsa-miR-520b    |
| hsa-miR-146b   | hsa-miR-24    | hsa-miR-410    | hsa-miR-520c    |
| hsa-miR-147    | hsa-miR-25    | hsa-miR-412    | hsa-miR-520d    |
| hsa-miR-148a   | hsa-miR-26a   | hsa-miR-422a   | hsa-miR-520d*   |
| hsa-miR-148b   | hsa-miR-26b   | hsa-miR-422b   | hsa-miR-520e    |
| hsa-miR-149    | hsa-miR-27a   | hsa-miR-423    | hsa-miR-520f    |
| hsa-miR-150    | hsa-miR-27b   | hsa-miR-424    | hsa-miR-520g    |

|               |                |                |                |
|---------------|----------------|----------------|----------------|
| hsa-miR-151   | hsa-miR-28     | hsa-miR-425    | hsa-miR-520h   |
| hsa-miR-152   | hsa-miR-296    | hsa-miR-429    | hsa-miR-521    |
| hsa-miR-153   | hsa-miR-299-3p | hsa-miR-431    | hsa-miR-522    |
| hsa-miR-154   | hsa-miR-299-5p | hsa-miR-432    | hsa-miR-523    |
| hsa-miR-154*  | hsa-miR-29a    | hsa-miR-432*   | hsa-miR-524    |
| hsa-miR-155   | hsa-miR-29b    | hsa-miR-433    | hsa-miR-524*   |
| hsa-miR-15a   | hsa-miR-29c    | hsa-miR-448    | hsa-miR-525    |
| hsa-miR-15b   | hsa-miR-301    | hsa-miR-449    | hsa-miR-525*   |
| hsa-miR-16    | hsa-miR-302a   | hsa-miR-450    | hsa-miR-526a   |
| hsa-miR-17-3p | hsa-miR-302a*  | hsa-miR-451    | hsa-miR-526b   |
| hsa-miR-17-5p | hsa-miR-302b   | hsa-miR-452    | hsa-miR-526b*  |
| hsa-miR-181a  | hsa-miR-302b*  | hsa-miR-452*   | hsa-miR-526c   |
| hsa-miR-181b  | hsa-miR-302c   | hsa-miR-453    | hsa-miR-527    |
| hsa-miR-181c  | hsa-miR-302c*  | hsa-miR-455    | hsa-miR-539    |
| hsa-miR-181d  | hsa-miR-302d   | hsa-miR-483    | hsa-miR-542-3p |
| hsa-miR-182   | hsa-miR-30a-3p | hsa-miR-484    | hsa-miR-542-5p |
| hsa-miR-182*  | hsa-miR-30a-5p | hsa-miR-485-3p | hsa-miR-544    |
| hsa-miR-183   | hsa-miR-30b    | hsa-miR-485-5p | hsa-miR-545    |
| hsa-miR-184   | hsa-miR-30c    | hsa-miR-486    | hsa-miR-7      |
| hsa-miR-185   | hsa-miR-30d    | hsa-miR-487a   | hsa-miR-9      |
| hsa-miR-186   | hsa-miR-30e-3p | hsa-miR-487b   | hsa-miR-9*     |
| hsa-miR-187   | hsa-miR-30e-5p | hsa-miR-488    | hsa-miR-92     |
| hsa-miR-188   | hsa-miR-31     | hsa-miR-489    | hsa-miR-93     |
| hsa-miR-189   | hsa-miR-32     | hsa-miR-490    | hsa-miR-95     |
| hsa-miR-18a   | hsa-miR-320    | hsa-miR-491    | hsa-miR-96     |
| hsa-miR-18a*  | hsa-miR-323    | hsa-miR-492    | hsa-miR-98     |
| hsa-miR-18b   | hsa-miR-324-3p | hsa-miR-493-3p | hsa-miR-99a    |
| hsa-miR-190   | hsa-miR-324-5p | hsa-miR-493-5p | hsa-miR-99b    |

**TABLE 4. The prediction results for the design set of 66 human miR-mRNA duplexes.**

<sup>1</sup> the top 51 duplexes include miRs with seed regions that are perfectly complementary to the corresponding coding regions; duplexes numbered 52 to 66 inclusive include miRs for which the coding region is only partially complementary to the coding region.

<sup>2</sup> the third column gives name of the 3'UTR of the corresponding target gene as listed in TarBase; since multiple 3'UTRs are possible for a given gene, we selected the longest 3'UTR that includes the target site.

<sup>3</sup> values the last five columns denote number of predicted targets; 1 means that the corresponding method correctly predicted a given target; 0 denotes the a given method failed to predict a given target; 1+k shows that the corresponding method predicted a given target as well as  $k$  extra, unpublished targets; 0+k means that the corresponding method failed to predict published target but predicted  $k$  extra unpublished targets.

| no <sup>1</sup> | miR - mRNA pair  | actual target <sup>2</sup> (start-end) | Predictions <sup>3</sup> |        |              |              |          |
|-----------------|------------------|----------------------------------------|--------------------------|--------|--------------|--------------|----------|
|                 |                  |                                        | HuMiTar                  | PicTar | DIANA-MicroT | Target ScanS | NBmiRTar |
| 1               | miR-375 MTPN     | NM_145808.1 (3121-3141)                | 1                        | 1      | 0            | 1            | 1        |
| 2               | let-7b LIN28     | NM_024674.3 (890-912)                  | 1                        | 1+1    | 1            | 1            | 1+1      |
| 3               | miR-141 Clock    | NM_004898.2 (215-233)                  | 1+2                      | 0      | 1            | 1+1          | 0+1      |
| 4               | miR-24 MAPK14    | NM_001315.1 (651-669)                  | 1                        | 0      | 1            | 0            | 0        |
| 5               | miR-23a C6orf134 | NM_024909.1 (209-226)                  | 1                        | 0      | 1            | 1            | 0        |
| 6               | let-7e SMC1L1    | NM_006306.2 (73-91)                    | 1+3                      | 0      | 1            | 1+3          | 0+7      |
| 7               | miR-15a DMTF1    | NM_021145.1 (130-146)                  | 1                        | 1      | 1            | 1            | 1        |
| 8               | miR-16 CGI-38    | NM_016140.1 (294-311)                  | 1+1                      | 1      | 1            | 1            | 0        |
| 9               | miR-199b LAMC2   | NM_005562.1 (209-222)                  | 1                        | 0      | 1            | 0            | 1        |
| 10              | miR-23 HES1      | NM_005524.2 (267-288)                  | 1                        | 1      | 0            | 0            | 1        |
| 11              | miR-20a E2F1     | NM_005225.1 (371-394)                  | 1                        | 1      | 0            | 1            | 0        |
| 12              | miR-20a E2F1     | NM_005225.1 (943-987)                  | 1                        | 1      | 0            | 1            | 1+1      |
| 13              | miR-17-5p E2F1   | NM_005225.1 (371-394)                  | 1                        | 1+1    | 0            | 1            | 0        |
| 14              | miR-17-5p E2F1   | NM_005225.1 (943-987)                  | 1                        | 1      | 0            | 1            | 1+1      |
| 15              | miR-143 MAPK7    | NM_139032.1 (91-127)                   | 1                        | 0      | 0            | 1            | 1        |
| 16              | miR-1 Hand2      | NM_021973.1 (208-232)                  | 1                        | 1      | 0            | 1            | 0        |
| 17              | miR-1 TMSB4X     | NM_021109.2 (17-36)                    | 1                        | 0      | 0            | 1            | 1        |
| 18              | miR-23 POU4F2    | NM_004575.1 (89-109)                   | 1                        | 1      | 0            | 1            | 1        |
| 19              | miR-23 POU4F2    | NM_004575.1 (156-180)                  | 1                        | 1      | 0            | 0            | 1        |
| 20              | miR-23 POU4F2    | NM_004575.1 (449-470)                  | 1                        | 1      | 0            | 1            | 0        |
| 21              | miR-101 EZH2     | NM_004456.3 (46-66)                    | 1                        | 1      | 0            | 1            | 1        |
| 22              | miR-101 EZH2     | NM_004456.3 (88-121)                   | 1                        | 1      | 0            | 1            | 1        |
| 23              | miR-101 MYCN     | NM_005378.3 (579-501)                  | 1                        | 1      | 0            | 1            | 1        |
| 24              | miR-101 MYCN     | NM_005378.3 (553-570)                  | 1                        | 1      | 0            | 1            | 1        |
| 25              | miR-19a PTEN     | NM_000314.2 (396-418)                  | 1                        | 0      | 0            | 1            | 0        |
| 26              | miR-34 DLL1      | NM_005618.2 (183-204)                  | 1                        | 1      | 0            | 0            | 1        |
| 27              | miR-34 DLL1      | NM_005618.2 (281-300)                  | 1                        | 1      | 0            | 1            | 1        |
| 28              | miR-34 DLL1      | NM_005618.2 (333-363)                  | 1                        | 1      | 0            | 1            | 1        |
| 29              | miR-34 Notch1    | NM_017617.2 (145-186)                  | 1+1                      | 1+4    | 0            | 1            | 1+2      |

|                                               |                  |                         |     |     |    |    |     |
|-----------------------------------------------|------------------|-------------------------|-----|-----|----|----|-----|
| 30                                            | miR-34 Notch1    | NM_017617.2 (894-916)   | 1   | 1   | 0  | 1  | 1   |
| 31                                            | miR-1b G6PD      | NM_000402.2 (83-104)    | 1   | 0   | 0  | 0  | 1   |
| 32                                            | miR-1b G6PD      | NM_000402.2 (140-172)   | 1   | 0   | 0  | 1  | 0   |
| 33                                            | miR-1b G6PD      | NM_000402.2 (419-440)   | 1   | 0   | 0  | 1  | 1   |
| 34                                            | miR-1b BDNF      | NM_170731.2 (194-227)   | 1   | 1+2 | 0  | 1  | 1   |
| 35                                            | miR-1b BDNF      | NM_170731.2 (375-395)   | 1   | 1   | 0  | 1  | 0   |
| 36                                            | miR-1b BDNF      | NM_170731.2 (1306-1329) | 1   | 1   | 0  | 1  | 1   |
| 37                                            | miR-130 CSF1     | NM_000757.3 (782-807)   | 1   | 1+3 | 0  | 1  | 1   |
| 38                                            | miR-26 SMAD1     | NM_005900.1 (25-52)     | 1   | 1+1 | 0  | 1  | 0   |
| 39                                            | miR-26 SMAD1     | NM_005900.1 (91-109)    | 1   | 1   | 0  | 1  | 1   |
| 40                                            | miR-23a CXCL12   | NM_000609.3 (1352-1394) | 1   | 0   | 0  | 0  | 0+3 |
| 41                                            | miR-23a CXCL12   | NM_000609.3 (1439-1459) | 1   | 0   | 0  | 0  | 0   |
| 42                                            | let-7a KRAS2     | NM_033360.2 (3246-3273) | 1   | 0   | 0  | 0  | 1   |
| 43                                            | miR-15a BCL2     | NM_000633.1 (2511-2536) | 1+3 | 1+2 | 0  | 1  | 1   |
| 44                                            | miR-16 BCL2      | NM_000633.1 (2511-2536) | 1+3 | 1+3 | 0  | 1  | 1   |
| 45                                            | miR-132 RICS     | NM_014715.2 (30-51)     | 1   | 1   | 0  | 1  | 0   |
| 46                                            | miR-223 NFIA     | NM_005595.1 (737-760)   | 1   | 1+1 | 1  | 1  | 1   |
| 47                                            | miR-221 KIT      | NM_000222.1 (1014-1037) | 1+1 | 0   | 0  | 1  | 1   |
| 48                                            | miR-222 KIT      | NM_000222.1 (1014-1037) | 1   | 0   | 0  | 1  | 1   |
| 49                                            | miR-1 HDAC4      | NM_006037.2 (3502-3522) | 1   | 1+4 | 0  | 1  | 0   |
| 50                                            | miR-1 HDAC4      | NM_006037.2 (3534-3554) | 1   | 1   | 0  | 1  | 1   |
| 51                                            | miR-10a HOXA1    | NM_153620.1 (947-976)   | 1   | 1+1 | 0  | 1  | 0   |
| 52                                            | miR-145 FLJ21308 | NM_024615.2             | 0   | 0   | 1  | 0  | 0   |
| 53                                            | miR-103 FBXW1B   | NM_012300.1             | 0+1 | 0   | 1  | 0  | 1+1 |
| 54                                            | miR-23 HES1      | Y07572                  | 0   | 0   | 0  | 0  | 1   |
| 55                                            | miR-23 HES1      | NM_005524.2             | 0   | 0   | 0  | 0  | 0   |
| 56                                            | miR-23 HES1      | NM_005524.2             | 0   | 0   | 0  | 0  | 0   |
| 57                                            | let-7a KRAS2     | NM_033360.2             | 0   | 0   | 0  | 0  | 0+3 |
| 58                                            | let-7a KRAS2     | NM_033360.2             | 0   | 0   | 0  | 0  | 0   |
| 59                                            | let-7a KRAS2     | NM_033360.2             | 0   | 0   | 0  | 0  | 1   |
| 60                                            | let-7a KRAS2     | NM_033360.2             | 0   | 0   | 0  | 0  | 0   |
| 61                                            | let-7a NRAS      | NM_002524.2             | 0+1 | 0   | 0  | 0  | 0+1 |
| 62                                            | let-7a NRAS      | NM_002524.2             | 0   | 0   | 0  | 0  | 0   |
| 63                                            | let-7a NRAS      | NM_002524.2             | 0   | 0   | 0  | 0  | 0   |
| 64                                            | let-7a NRAS      | NM_002524.2             | 0   | 1   | 0  | 1  | 0   |
| 65                                            | miR-133a SRF     | NM_003131.1             | 0   | 0   | 0  | 0  | 1   |
| 66                                            | miR-133a SRF     | NM_003131.1             | 0   | 0   | 0  | 0  | 1   |
| total number of predicted published targets   |                  |                         | 51  | 36  | 11 | 43 | 38  |
| total number of predicted unpublished targets |                  |                         | 16  | 23  | 0  | 4  | 21  |

**TABLE 5. The prediction results for the independent set of 39 human miR-mRNA duplexes.**

<sup>1</sup> the top 32 duplexes include miRs with seed regions that are perfectly complementary to the corresponding coding regions; duplexes numbered 33 to 39 inclusive include miRs for which the coding region is only partially complementary to the coding region.

<sup>2</sup> the third column gives name of the 3'UTR of the corresponding target gene as listed in TarBase; since multiple 3'UTRs are possible for a given gene, we selected the longest 3'UTR that includes the target site.

<sup>3</sup> values the last five columns denote number of predicted targets; 1 means that the corresponding method correctly predicted a given target; 0 denotes the a given method failed to predict a given target; 1+k shows that the corresponding method predicted a given target as well as  $k$  extra, unpublished targets; 0+k means that the corresponding method failed to predict published target but predicted  $k$  extra unpublished targets.

| no <sup>1</sup> | miR - mRNA pair          | actual target <sup>2</sup> (start-end) | predictions <sup>4</sup> |        |              |              |          |
|-----------------|--------------------------|----------------------------------------|--------------------------|--------|--------------|--------------|----------|
|                 |                          |                                        | HuMiTar                  | PicTar | DIANA-MicroT | Target ScanS | NBmiRTar |
| 1               | miR-155 AGTR1            | NM_000685.3 (79-90)                    | 1+2                      | 0      | 0            | 1            | 0        |
| 2               | miR-140 HDAC4            | NM_006037.2 (439-460)                  | 1                        | 1+3    | 0            | 1            | 0        |
| 3               | miR-17-5p NCOA3          | NM_006534.2 (1282-1303)                | 1+4                      | 1+3    | 0            | 1+1          | 1        |
| 4               | miR-27b CYP1B1           | NM_000104.2 (2726-2749)                | 1+1                      | 1+5    | 0            | 1            | 0        |
| 5               | miR-206 Fstl1            | NM_007085.3 (2099-2121)                | 1+2                      | 0      | 0            | 1+1          | 1        |
| 6               | miR-206 Utrn             | NM_007124.1 (454-477)                  | 1                        | 0      | 0            | 0            | 1        |
| 7               | miR-189 SLITRK1          | NM_052910.1 (675-697)                  | 1                        | 0      | 0            | 0            | 0        |
| 8               | miR-206 GJA1             | NM_000165.2 (459-485)                  | 1+1                      | 1+1    | 0            | 1            | 1+1      |
| 9               | miR-206 GJA1             | NM_000165.2 (1598-1618)                | 1                        | 1      | 0            | 1            | 1        |
| 10              | miR-1 GJA1               | NM_000165.2 (467-485)                  | 1+1                      | 1+2    | 0            | 1            | 1+1      |
| 11              | miR-1 GJA1               | NM_000165.2 (1598-1618)                | 1                        | 1      | 0            | 1            | 1        |
| 12              | miR-29 Tcl1A             | NM_021966.1 (428-450)                  | 1                        | 0      | 0            | 1            | 0        |
| 13              | miR-122 SLC7A1           | NM_003045.2 (1073-1098)                | 1+1                      | 1      | 0            | 1            | 0+2      |
| 14              | miR-122 SLC7A1           | NM_003045.2 (1345-1371)                | 1                        | 1      | 0            | 1            | 0        |
| 15              | miR-125a ERBB2           | NM_004448.1 (17-44)                    | 1                        | 0      | 0            | 1            | 1        |
| 16              | miR-125b ERBB3           | NM_001982.1 (8-26)                     | 1                        | 0      | 0            | 0            | 1        |
| 17              | miR-133 PTBP2            | NM_021190.1 (63-81)                    | 1                        | 1+1    | 1            | 1            | 0        |
| 18              | miR-133 PTBP2            | NM_021190.1 (1008-1042)                | 1                        | 1      | 0            | 1            | 0        |
| 19              | miR-34a E2F3             | NM_001949.2 (2713-2736)                | 1                        | 1+5    | 0            | 1            | 0+1      |
| 20              | miR-21 TPM1              | NM_000366.4 (221-242)                  | 1                        | 0      | 0            | 0            | 0        |
| 21              | miR-376a-5p SFRS11       | NM_004768.2 (761-783)                  | 1+2                      | 0      | 0            | 0            | 0        |
| 22              | miR-376a-5p SFRS11       | NM_004768.2 (924-948)                  | 1                        | 0      | 0            | 0            | 0        |
| 23              | miR-376a-5p SLC16A1      | NM_003051.2 (55-78)                    | 1                        | 0      | 0            | 0            | 0        |
| 24              | miR-376a-5p SLC16A1      | NM_003051.2 (812-833)                  | 1                        | 0      | 0            | 0            | 0        |
| 25              | miR-376a-5p TTK          | NM_003318.3 (54-81)                    | 1                        | 0      | 0            | 0            | 0        |
| 26              | miR-376a-5p TTK          | NM_003318.3 (208-229)                  | 1                        | 0      | 0            | 0            | 0        |
| 27              | Edited-miR-376a-5p PRPS1 | NM_002764.2 (17-39)                    | 1                        | 0      | 0            | 0            | 0        |
| 28              | Edited-miR-376a-5p SNX19 | NM_014758.1 (369-370)                  | 1                        | 0      | 0            | 0            | 0        |
| 29              | Edited-miR-376a-5p SNX19 | NM_014758.1 (687-704)                  | 1                        | 0      | 0            | 0            | 0        |

|                                               |                           |                         |     |     |   |    |     |
|-----------------------------------------------|---------------------------|-------------------------|-----|-----|---|----|-----|
| 30                                            | miR-208 THRAP1            | NM_005121.1 (549-572)   | 1+1 | 1+1 | 0 | 1  | 0   |
| 31                                            | miR-29b MCL1              | NM_021960.3 (1318-1340) | 1+1 | 1+1 | 0 | 1  | 0   |
| 32                                            | miR-1 KCNJ2               | NM_000891.2 (1062-1081) | 1   | 0   | 0 | 0  | 1   |
| 33                                            | miR-127 BCL6              | NM_001706.2             | 0   | 0   | 0 | 0  | 0   |
| 34                                            | miR-181 Tcl1A             | NM_021966.1             | 0   | 0   | 0 | 0  | 0   |
| 35                                            | miR-122 SLC7A1            | NM_003045.2             | 0   | 1   | 0 | 0  | 0   |
| 36                                            | let-7a NF2                | NM_181826.1             | 0   | 0   | 0 | 0  | 0+1 |
| 37                                            | Edited-miR-376a-5p PRPS1  | NM_002764.2             | 0   | 0   | 0 | 0  | 0   |
| 38                                            | Edited-miR-376a-5p ZNF513 | NM_144631.4             | 0   | 0   | 0 | 0  | 0   |
| 39                                            | Edited-miR-376a-5p ZNF513 | NM_144631.4             | 0   | 0   | 0 | 0  | 0   |
| total number of predicted published targets   |                           |                         | 32  | 15  | 1 | 18 | 10  |
| total number of predicted unpublished targets |                           |                         | 16  | 22  | 0 | 2  | 6   |

**TABLE 6. Comparison of PicTar and HuMiTar predictions for GO set.**

The reported values include the number of targets predicted by PicTar, the number of targets predicted by both PicTar and HuMiTar, the number of targets predicted only by PicTar, and the number of targets predicted only by HuMiTar.

<sup>1</sup>results in bold concern Septin7 for which experimental verification was performed

<sup>2</sup>results for PicTar are limited to a subset of miRs that were available in the PicTar's database (<http://pictar.bio.nyu.edu/>).

| Gene ID                      | # targets predicted by PicTar <sup>2</sup> | # targets predicted by HuMiTar and PicTar | # targets predicted only by PicTar | # of targets predicted only by HuMiTar                     |                                                               |
|------------------------------|--------------------------------------------|-------------------------------------------|------------------------------------|------------------------------------------------------------|---------------------------------------------------------------|
|                              |                                            |                                           |                                    | For these miRs that were included in the PicTar's database | only for miRs that were not included in the PicTar's database |
| NM_000165                    | 21                                         | 19                                        | 2                                  | 51                                                         | 51                                                            |
| NM_033360                    | 27                                         | 27                                        | 0                                  | 106                                                        | 69                                                            |
| NM_005228                    | 4                                          | 4                                         | 0                                  | 73                                                         | 53                                                            |
| NM_053056                    | 28                                         | 28                                        | 0                                  | 96                                                         | 75                                                            |
| NM_003392                    | 6                                          | 6                                         | 0                                  | 115                                                        | 65                                                            |
| NM_002467                    | 3                                          | 3                                         | 0                                  | 15                                                         | 10                                                            |
| NM_017617                    | 5                                          | 5                                         | 0                                  | 69                                                         | 47                                                            |
| NM_001904                    | 5                                          | 5                                         | 0                                  | 41                                                         | 16                                                            |
| <b>NM_001788<sup>1</sup></b> | <b>19</b>                                  | <b>18</b>                                 | <b>1</b>                           | <b>34</b>                                                  | <b>23</b>                                                     |
| NM_000314                    | 14                                         | 13                                        | 1                                  | 46                                                         | 33                                                            |
| Total                        | 132                                        | 128 (97%)                                 | 4 (3%)                             | 646                                                        | 442                                                           |

**TABLE 7. Comparison of TargetScanS and HuMiTar predictions for GO set.**

The reported values include the number of targets predicted by TargetScanS, the number of targets predicted by both TargetScanS and HuMiTar, the number of targets predicted only by TargetScanS, and the number of targets predicted only by HuMiTar.

<sup>1</sup>results in bold concern Septin7 for which experimental verification was performed.

| Gene ID                      | # targets predicted by TargetScanS | # targets predicted by HuMiTar and TargetScanS | # targets predicted only by TargetScanS | # targets predicted only by HuMiTar |
|------------------------------|------------------------------------|------------------------------------------------|-----------------------------------------|-------------------------------------|
| NM_000165                    | 74                                 | 70                                             | 4                                       | 51                                  |
| NM_033360                    | 109                                | 107                                            | 2                                       | 95                                  |
| NM_005228                    | 66                                 | 65                                             | 1                                       | 65                                  |
| NM_053056                    | 119                                | 116                                            | 3                                       | 83                                  |
| NM_003392                    | 111                                | 108                                            | 3                                       | 78                                  |
| NM_002467                    | 18                                 | 14                                             | 4                                       | 14                                  |
| NM_017617                    | 54                                 | 50                                             | 4                                       | 71                                  |
| NM_001904                    | 21                                 | 20                                             | 1                                       | 42                                  |
| <b>NM_001788<sup>1</sup></b> | <b>41</b>                          | <b>36</b>                                      | <b>5</b>                                | <b>39</b>                           |
| NM_000314                    | 109                                | 68                                             | 41                                      | 24                                  |
| Total                        | 722                                | 654 (91%)                                      | 68 (9%)                                 | 562                                 |

**TABLE 8. Comparison of NBmiRTar and HuMiTar predictions for GO set.**

The reported values include the number of targets predicted by NBmiRTar, the number of targets predicted by both NBmiRTar and HuMiTar, the number of targets predicted only by NBmiRTar, and the number of targets predicted only by HuMiTar.

| Gene ID   | # targets predicted by NBmiRTar | # targets predicted by HuMiTar and NBmiRTar | # targets predicted only by NBmiRTar | # targets predicted only by HuMiTar |
|-----------|---------------------------------|---------------------------------------------|--------------------------------------|-------------------------------------|
| NM_000165 | 45                              | 23                                          | 22                                   | 98                                  |
| NM_033360 | 88                              | 65                                          | 23                                   | 137                                 |
| NM_005228 | 34                              | 14                                          | 20                                   | 116                                 |
| NM_053056 | 91                              | 70                                          | 21                                   | 129                                 |
| NM_003392 | 78                              | 34                                          | 44                                   | 152                                 |
| NM_002467 | 6                               | 0                                           | 6                                    | 28                                  |
| NM_017617 | 63                              | 30                                          | 33                                   | 91                                  |
| NM_001904 | 22                              | 10                                          | 12                                   | 52                                  |
| NM_001788 | 28                              | 10                                          | 18                                   | 65                                  |
| NM_000314 | 25                              | 11                                          | 14                                   | 81                                  |
| Total     | 480                             | 267 (56%)                                   | 213 (44%)                            | 949                                 |

**TABLE 9. List of 10 miRs used to calculate execution time.**

|                |              |             |             |
|----------------|--------------|-------------|-------------|
| hsa-miR-139    | hsa-miR-106b | hsa-miR-21  | hsa-miR-23a |
| hsa-miR-768-3p | hsa-miR-221  | hsa-miR-222 |             |
| hsa-miR-15b    | hsa-miR-27a  | hsa-miR-23b |             |

**TABLE 10. Conditional probability  $p(T_i:T_j | \text{mRNA site})$  (top number) of nucleotide pairs from the seed regions of the 66 human miR-mRNAs duplexes, and unconditional probability,  $q(T_i:T_j)$  (bottom number) of the binding of the miR's seed region along the entire 66 human mRNAs.**

The matrix is symmetric, i.e., “-“ denotes that the corresponding value is symmetric.

|       | A              | C              | G              | T (U)          |
|-------|----------------|----------------|----------------|----------------|
| A     | 0.005<br>0.051 | 0.005<br>0.068 | 0<br>0.131     | 0.488<br>0.161 |
| C     | -              | 0.002<br>0.022 | 0.458<br>0.092 | 0<br>0.109     |
| G     | -              | -              | 0.002<br>0.072 | 0.033<br>0.180 |
| T (U) | -              | -              | -              | 0.<br>0.114    |

**TABLE 11. miR-mRNA binding affinity  $k(T_i:T_j)$  of nucleotide pairs from the seed region (top number) and from regions 1 and 2 combined (bottom number).**

The matrix is symmetric, i.e., “-” denotes that the corresponding value is symmetric.

|       | A              | C              | G              | T (U)         |
|-------|----------------|----------------|----------------|---------------|
| A     | -3.37<br>-1.04 | -3.78<br>-2.03 | -10<br>-1.97   | 1.6<br>1.14   |
| C     | -              | -3.74<br>-1.56 | 2.32<br>1.41   | -10<br>-1.11  |
| G     | -              | -              | -5.44<br>-1.16 | -2.43<br>0.31 |
| T (U) | -              | -              | -              | -4.1<br>-1.02 |



**TABLE 12. Alignment matrix for compacted forms of miR-mRNA duplexes.**

“-“ denotes a gap,  $|A_i|$  denotes length of string  $A_i$ ,  $s_{ij} = s_{ji} = -|A_i||A_j|$  where  $i \neq j$ .

|       |          |          |          |          |            |            |            |            |            |          |
|-------|----------|----------|----------|----------|------------|------------|------------|------------|------------|----------|
|       | a        | c        | g        | u        | $A_1$      | $A_2$      | $A_3$      | $A_4$      | $A_5$      | -        |
| a     | -2       | -2       | -2       | 2        | $- A_1 $   | $- A_2 $   | $- A_3 $   | $- A_4 $   | $- A_5 $   | 0        |
| c     | -2       | -2       | 2        | -2       | $- A_1 $   | $- A_2 $   | $- A_3 $   | $- A_4 $   | $- A_5 $   | 0        |
| g     | -2       | 2        | -2       | 2        | $- A_1 $   | $- A_2 $   | $- A_3 $   | $- A_4 $   | $- A_5 $   | 0        |
| u     | 2        | -2       | 2        | -2       | $- A_1 $   | $- A_2 $   | $- A_3 $   | $- A_4 $   | $- A_5 $   | 0        |
| $A_1$ | $- A_1 $ | $- A_1 $ | $- A_1 $ | $- A_1 $ | $- A_1 ^2$ | $s_{12}$   | $s_{13}$   | $s_{14}$   | $s_{15}$   | $- A_1 $ |
| $A_2$ | $- A_2 $ | $- A_2 $ | $- A_2 $ | $- A_2 $ | $s_{21}$   | $- A_2 ^2$ | $s_{23}$   | $s_{24}$   | $s_{25}$   | $- A_2 $ |
| $A_3$ | $- A_3 $ | $- A_3 $ | $- A_3 $ | $- A_3 $ | $s_{31}$   | $s_{32}$   | $- A_3 ^2$ | $s_{34}$   | $s_{35}$   | $- A_3 $ |
| $A_4$ | $- A_4 $ | $- A_4 $ | $- A_4 $ | $- A_4 $ | $s_{41}$   | $s_{42}$   | $s_{43}$   | $- A_4 ^2$ | $s_{45}$   | $- A_4 $ |
| $A_5$ | $- A_5 $ | $- A_5 $ | $- A_5 $ | $- A_5 $ | $s_{51}$   | $s_{52}$   | $s_{53}$   | $s_{54}$   | $- A_5 ^2$ | $- A_5 $ |
| -     | 0        | 0        | 0        | 0        | $- A_1 $   | $- A_2 $   | $- A_3 $   | $- A_4 $   | $- A_5 $   | -100     |

**TABLE 13. Example compacted forms of miR-mRNA duplexes.**

| mRNA-miR        | miR-mRNA duplex<br>(mRNA at the top, miR below)                                                         | Compacted forms<br>(mRNA at the top, miR below)                                                                                                                                  |
|-----------------|---------------------------------------------------------------------------------------------------------|----------------------------------------------------------------------------------------------------------------------------------------------------------------------------------|
| CX43-miR-30a-5p | UUUUUGUGGUGUGGGCCAAUAUGGUGUUUACA<br>•  •   • •   •       <br>CGAAGGUCA--GCUC-----CUACAAAUGU             | uA <sub>4</sub> guggugA <sub>2</sub> ccaauauA <sub>3</sub> uA <sub>1</sub> a<br>cA <sub>4</sub> gucaA <sub>2</sub> A <sub>3</sub> aA <sub>1</sub> u                              |
| CX43-miR-30d    | UUUUGUGGUGUGGGCCAAUAUGGUGUUUACA<br>  •   •     •       <br>GAAGGUCA--GCCC-----CUACAAAUGU                | A <sub>4</sub> guggugA <sub>2</sub> ccaauauA <sub>3</sub> uA <sub>1</sub> a<br>A <sub>4</sub> gucaA <sub>2</sub> A <sub>3</sub> aA <sub>1</sub> u                                |
| CX43-miR-30e-5p | NNUGGUGUGGGCCAAUAUGGUGUUUACA<br>••   •   •       <br>AGGUCAGUUC-----UACAAAUGU                           | nnA <sub>2</sub> guA <sub>3</sub> ccaauauA <sub>4</sub> uA <sub>1</sub> a<br>agA <sub>2</sub> guA <sub>3</sub> A <sub>4</sub> aA <sub>1</sub> u                                  |
| CX43-miR-199a*  | NAUCAUUGAUGCUUGAAUGAUAGAAUUUUAGUACUGUA<br> •           •          <br>UUGGUUAC-ACGU-----CUG-----AUGACAU | nA <sub>2</sub> uA <sub>5</sub> aA <sub>4</sub> uugaauA <sub>3</sub> aguuuuagA <sub>1</sub> a<br>uA <sub>2</sub> uA <sub>5</sub> A <sub>4</sub> uA <sub>3</sub> A <sub>1</sub> u |
| EGFR-miR-128a   | GGAAGUUGC--AUCCUUUGUCUCAAACUGUGA<br>••    •              <br>UUUUCUCUGGCCAAG-----UGACACU                | A <sub>2</sub> uuA <sub>4</sub> aA <sub>3</sub> cuuugucucaaaA <sub>1</sub> a<br>A <sub>2</sub> ucA <sub>4</sub> gccA <sub>3</sub> A <sub>1</sub> u                               |

## Supplementary figures

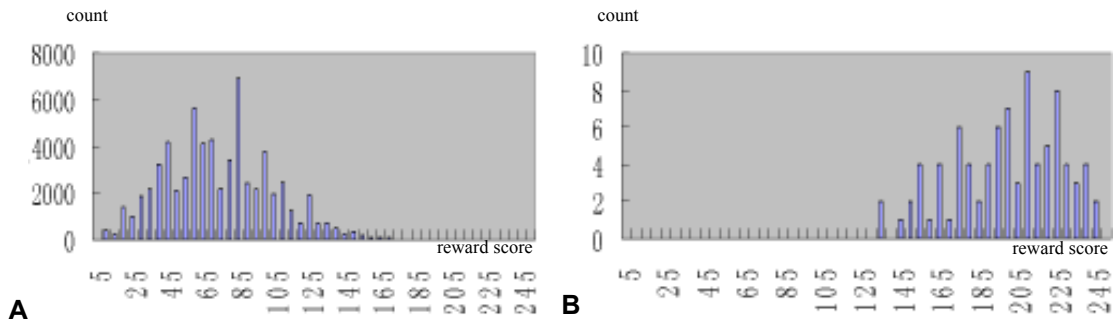

**FIGURE 1.** Histogram of the reward score values (*x*-axis) against the number of the corresponding targets (*y*-axis). (A) for targets that exclude the actual binding sites; (B) for the actual targets.

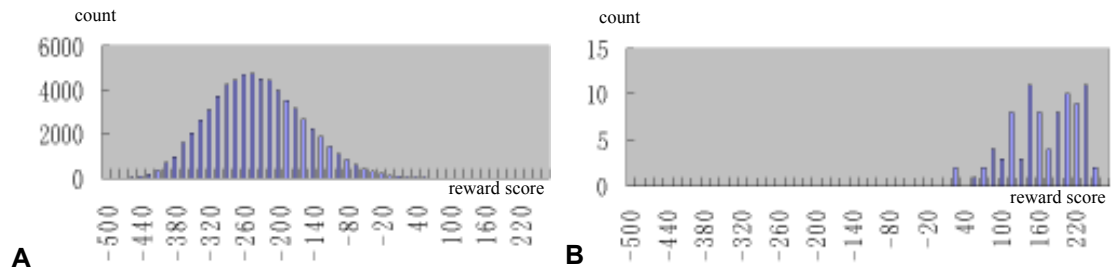

**FIGURE 2.** Histogram of the scoring function values (*x*-axis) against the number of corresponding targets (*y*-axis) (A) for targets that exclude the actual binding sites; (B) for the actual targets.

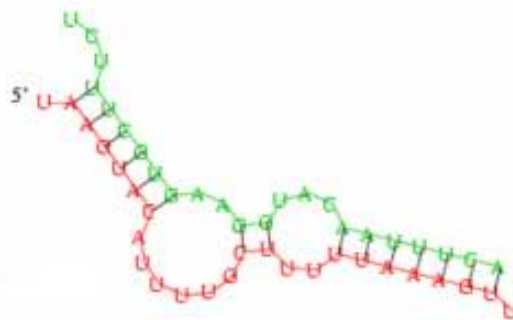

**FIGURE 3.** An example miR-mRNA duplex with bulges.

**Input:** miR(s) sequence and the 3'UTR sequence(s).

**Output:** the compacted sequence(s).

**Step I.** Check whether a given segment in 3'UTR provides complementary fit with the  $T_2 \dots T_7$  miR's segment (the complementary pairs do not include G:U).

If such segment exists then  $T_2 \dots T_7$  and the corresponding segment located in the 3'UTR sequence  $m_N m_{N-1} \dots m_2 m_1$  are denoted by  $A_1$  and go to step II; otherwise terminate.

**Step II.** For  $i_1 \geq 9$ , search for the longest segment  $T_{i_1} \dots T_{i_1+p_1}$  in the miR that satisfies the following two conditions:

1.  $p_1 \geq 2$  and  $i_1 - 8 \leq 15$

2. there exists a segment  $m_{N-j_1} \dots m_{N-j_1-p_1}$  in the 3'UTR sequence  $m_N m_{N-1} \dots m_2 m_1$  after  $A_1$

satisfying: (1)  $j_1 + p_1 - \text{end\_of\_}A_1 \leq 15$ ; and (2)  $m_{N-j_1} \dots m_{N-j_1-p_1}$  is complementary with  $T_{i_1} \dots T_{i_1+p_1}$

(the complementary pairs may include G:U)

If  $T_{i_1} \dots T_{i_1+p_1}$  and  $m_{N-j_1} \dots m_{N-j_1-p_1}$  exist, then they are denoted by  $A_2$  and go to step III; otherwise terminate.

**Step III.** Find  $A_3$  by scanning for the longest segment  $T_{i_2} \dots T_{i_2+p_2}$  that satisfies the following two conditions:

1.  $T_{i_2} \dots T_{i_2+p_2}$  is complementary with segment  $m_{N-j_2} \dots m_{N-j_2-p_2}$  that is located in  $m_N m_{N-1} \dots m_2 m_1$  and is sandwiched between  $A_1$  and  $A_2$

2. the largest value of  $p_2 \geq 2$  is found

If  $T_{i_2} \dots T_{i_2+p_2}$  exists then we denote  $T_{i_2} \dots T_{i_2+p_2}$  and  $m_{N-j_2} \dots m_{N-j_2-p_2}$  by  $A_3$  and go to step IV; otherwise go to step V.

**Step IV.** Search for  $A_4$  (and  $A_5$ ) using the following two sub-procedures:

**Step IVa.** Search for  $A_4$  between  $A_1$  and  $A_3$ , and if  $A_4$  exists then go to step IVb to search  $A_5$ ; otherwise go to step IVb to search  $A_4$ .

**Step IVb.** Search for  $A_4$  (or  $A_5$ ) between  $A_1$  and  $A_4$ , and if  $A_4$  (or  $A_5$ ) exists then stop; otherwise go to **Step V**.

**Step V.** If the segment  $A_1 \dots A_2$  in the 3'UTR sequence satisfies  $L(A_1, A_2) < 47$ , where  $L(A_1, A_2)$  is the total number of nts within  $A_1 \dots A_2$ , then go to **Step VI**; otherwise terminate.

**Step VI.** Search for the longest segment  $T_{i_2} \dots T_{i_2+p_2}$  between  $A_2$  and the end of miR that satisfies the following two conditions:

1.  $T_{i_2} \dots T_{i_2+p_2}$  is complementary with a segment  $m_{N-j_2} \dots m_{N-j_2-p_2}$  after  $A_2$  satisfying  $j_2 + p_2 - \text{end of } A_2 \leq 15$ ;

2. the largest value of  $p_2 \geq 2$  is found

Denote  $T_{i_2} \dots T_{i_2+p_2}$  and  $m_{N-j_2} \dots m_{N-j_2-p_2}$  by  $A_3$  and go to step VIa; otherwise go to step VII.

**Step VIa.** Search for  $A_4$  between  $A_2$  and  $A_3$ , and if  $A_4$  exists then go to step VIb; otherwise terminate.

**Step IVb.** Search for  $A_5$  between  $A_2$  and  $A_4$  or between  $A_4$  and  $A_3$ ; terminate after this search.

**Step VII.** If  $A_j$  exists in the region of 3'UTR sequence after  $A_2$  such that  $L(A_1, A_j) < 47$  then keep the  $A_j$ , and search for  $A_{j+1}$  between  $A_2$  and  $A_j$ ; otherwise terminate.

**FIGURE 4. Pseudo-code of the 2D-coding algorithm.**
